# Supplementary material
Source: PubMed Central journal article supplement (PMC2567502)
Supplement: 0807277105_0807277105SI.pdf [file 0807277105_0807277105SI.pdf]

# Supporting Information

Roseti *et al.* 10.1073/pnas.0807277105

Table S1. Clinical characteristics and neurophysiological findings of patients with refractory epilepsies

| P   | Sex | Age | Epilepsy onset | MRI     | Epileptogenic zone | Surgery | Histopathology |
|-----|-----|-----|----------------|---------|--------------------|---------|----------------|
| #1  | M   | 42  | 20             | R-T-Mes | R-T-Mes-Lat        | ETL     | MES            |
| #2  | M   | 44  | 28             | L-T-Mes | L-T-Mes-Lat        | ETL     | MES            |
| #3  | M   | 43  | 15             | R-T-Mes | R-T-Mes-Lat        | ETL     | MES            |
| #4  | Fe  | 40  | 7              | R-T-Mes | R-T-Mes-Lat        | ETL     | MES            |
| #5  | Fe  | 42  | 19             | R-T-FCD | R-T-Mes-Lat        | ETL     | FCD            |
| #6  | Fe  | 37  | 18             | L-T-Mes | L-T-Mes-Lat        | ETL     | MES            |
| #7  | M   | 44  | 16             | R-T-Mes | R-T-Mes-Lat        | ETL     | MES            |
| #8  | M   | 40  | 38             | R-T-Mes | R-T-Mes            | AMTL    | MES            |
| #9  | Fe  | 37  | 8              | L-F-FCD | L-F                | LES     | FCD            |
| #10 | Fe  | 25  | 15             | L-T-Mes | L-T-Mes-Lat        | ETL     | MES            |

P, patient; M, male; Fe, female; T, temporal; F, frontal; L, left; R, right; Lat, lateral; Mes, mesial; AMTL, anteromesial temporal lobectomy; ETL, extensive temporal lobectomy; LES, lesionectomy; MES, hippocampal mesial sclerosis; FCD, focal cortical dysplasia.
